# Supplementary figures and images for: Vitreous proteomic analysis of idiopathic epiretinal membranes
Source: Royal Society of Chemistry journal article supplement (doi:10.1039/c4mb00240g), 2014-06-27

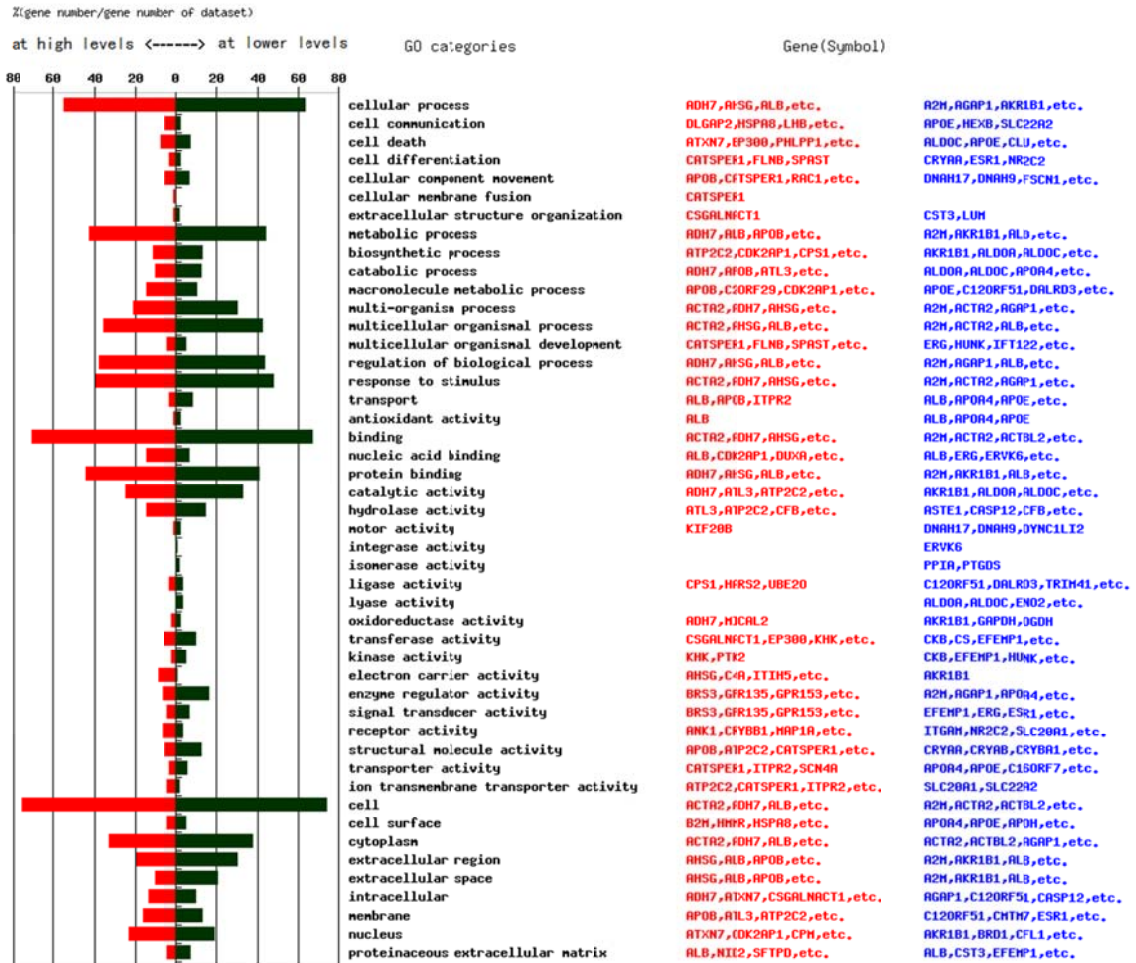

Supplement: c4mb00240g3.pdf [file c4mb00240g3.pdf]
